# Supplementary material for: Adhesion enhancementviathe synergistic effect of metal–ligand coordination and supramolecular host–guest interactions in luminescent hydrogels
Source: Royal Society of Chemistry journal article supplement (doi:10.1039/d0qi01203c), 2020-12-30
Supplement: d0qi01203c1.pdf [file d0qi01203c1.pdf]

**Supplementary Information**  
**for**  
**Adhesion Enhancement via Synergistic Effect of Metal–ligand**  
**Coordination and Supramolecular Host–guest Interaction in**  
**Luminescent Hydrogels**

*Xiao Liu,<sup>a</sup> Zhihua Song,<sup>b</sup> Zhiqiang Li<sup>\*a</sup> and Huanrong Li<sup>\*a</sup>*

<sup>a</sup>Tianjin Key Laboratory of Chemical Process Safety, School of Chemical Engineering and Technology, Hebei University of Technology, Guangrong Dao 8, Hongqiao District, Tianjin 300130, P. R. China. Email: zhiqiangli@hebut.edu.cn, lihuanrong@hebut.edu.cn

<sup>b</sup>School of Pharmacy, Collaborative Innovation Center of Advanced Drug Delivery System and Biotech Drugs in Universities of Shandong, Key Laboratory of Molecular Pharmacology and Drug Evaluation (Yantai University), Ministry of Education, Yantai University, Yantai, 264005, PR China

## Table of Contents

|                                                                                                       |    |
|-------------------------------------------------------------------------------------------------------|----|
| <b>Figure S1.</b> Synthetic pathway for <b>1</b>                                                      | S3 |
| <b>Figure S2.</b> Synthetic pathway for $\alpha$ CD-AAm                                               | S3 |
| <b>Figure S3.</b> Synthetic pathway for Azo-AAm                                                       | S3 |
| <b>Figure S4.</b> HRMS spectrum of Eu· <b>1</b> <sub>3</sub> .                                        | S3 |
| <b>Figure S5.</b> Adhesion energy tests                                                               | S4 |
| <b>Figure S6.</b> Adhesion energy tests                                                               | S4 |
| <b>Figure S7.</b> The decay curves of Ln· <b>1</b> <sub>3</sub> aqueous solution, hydrogel and powder | S4 |
| <b>Figure S8.</b> Photoresponsive adhesion tests                                                      | S5 |
| <b>Figure S9.</b> Digital images during T peeling test                                                | S5 |
| <b>Figure S10.</b> Digital images during T peeling test under UV lamp                                 | S6 |
| <b>Table S1.</b> Luminescence lifetime ( $\tau$ ) to Ln.                                              | S6 |

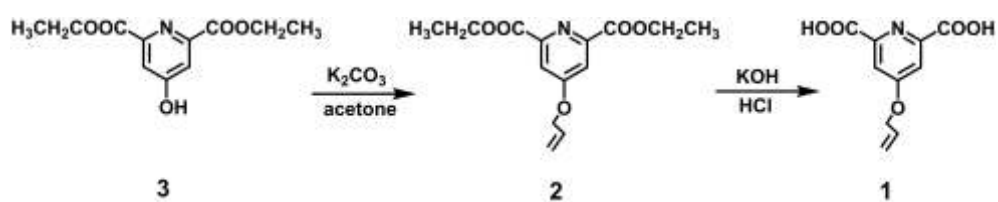

**Figure S1.** Synthetic pathway for **1**.

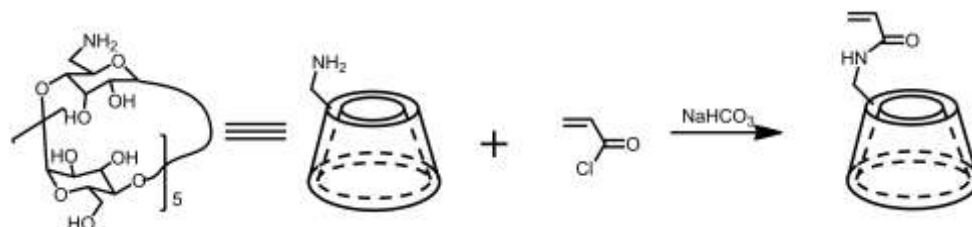

**Figure S2.** Synthetic pathway for  $\alpha$ CD-AAm.

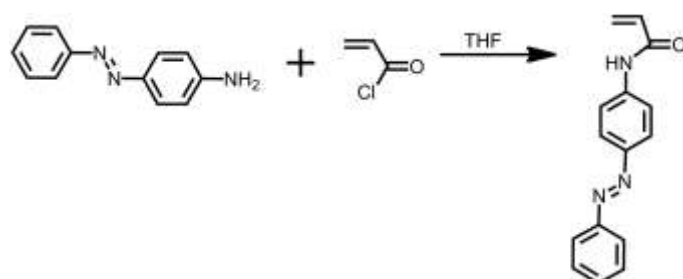

**Figure S3.** Synthetic pathway for Azo-AAm.

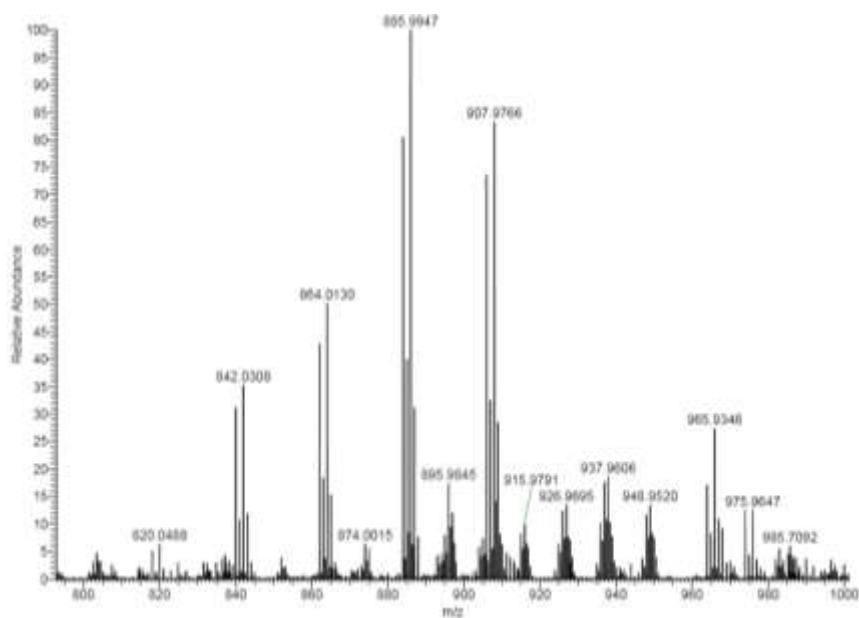

**Figure S4.** HRMS spectrum of Eu·13.

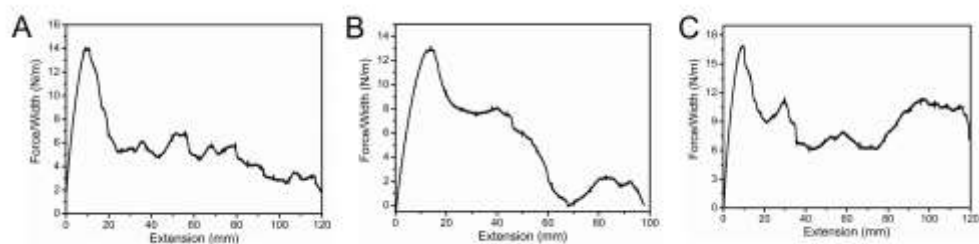

**Figure S5.** Adhesion energy between two pieces of PAAm hydrogels (A) heated and then compressed. (B) compressed and then heated. (C) compressed while heated.

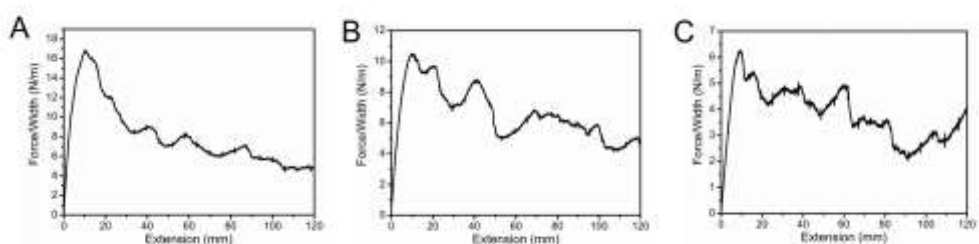

**Figure S6.** Adhesion energy when (A) 500  $\mu\text{L}$ , (B) 400  $\mu\text{L}$ , (C) 350  $\mu\text{L}$  stock solution was added onto the surface of PAAm hydrogel.

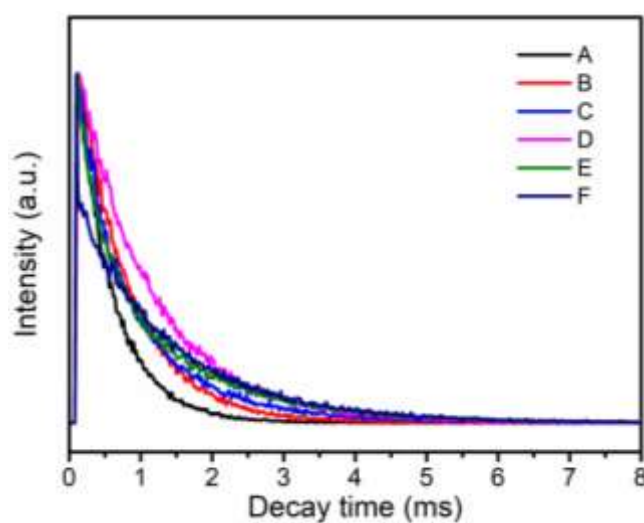

**Figure S7.** The decay curves of  $\text{Eu}\cdot\text{I}_3$  (A) and  $\text{Tb}\cdot\text{I}_3$  (B) aqueous solution,  $\text{Eu}$ -containing (C) and  $\text{Tb}$ -containing (D) hydrogel,  $\text{Eu}\cdot\text{I}_3$  (E) and  $\text{Tb}\cdot\text{I}_3$  (F) powder, (excited at 280 nm and monitored at 615 nm for  $\text{Eu}\cdot\text{I}_3$ , 544 nm for  $\text{Tb}\cdot\text{I}_3$ ).

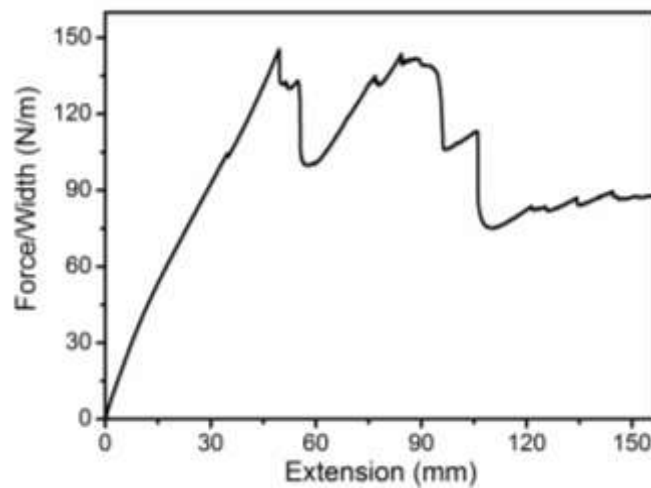

**Figure S8.** Adhesion between two pieces of PAAm hydrogels penetrated by stock solution and spread by stitching solution, then irradiated with 365 nm UV light about 2 h.

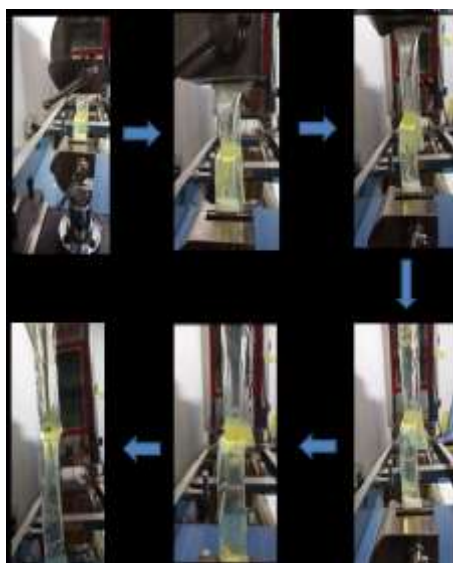

**Figure S9.** Digital images during T peeling test under daylight.

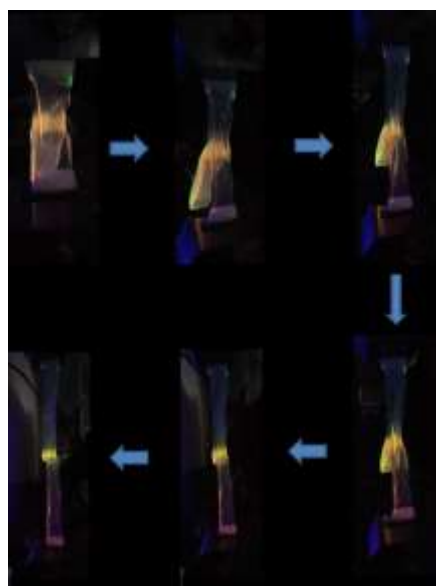

**Figure S10.** Digital images during T peeling test under 254 nm UV lamp illumination.

**Table S1.** Luminescence lifetime ( $\tau$ ) to Ln. ( $C(\text{Ln} \cdot \mathbf{1}_3) = 1.0 \times 10^{-2} \text{ M}$ )

| Sample                              | $\tau_{\text{H}}$ (ms) |
|-------------------------------------|------------------------|
| Eu· $\mathbf{1}_3$ aqueous solution | 0.51                   |
| Tb· $\mathbf{1}_3$ aqueous solution | 0.73                   |
| Eu-containing hydrogel              | 0.75                   |
| Tb-containing hydrogel              | 1.03                   |
| Eu· $\mathbf{1}_3$ powder           | 0.96                   |
| Tb· $\mathbf{1}_3$ powder           | 1.31                   |
